1 **Oceanic salt spray and herbivore pressure contribute to local adaptation of coastal**  
2 **perennial and inland annual ecotypes of the Seep Monkeyflower (*Mimulus guttatus*)**

3

4

5 Damian Popovic<sup>1,2</sup>, David B. Lowry<sup>1,2,3</sup>

6

7 1. Department of Plant Biology, Michigan State University, East Lansing, MI, USA

8 2. Program in Ecology, Evolutionary Biology, and Behavior, Michigan State University, East

9 Lansing, MI 48824, USA

10 3. Plant Resilience Institute, Michigan State University, East Lansing, MI 48824, USA

11

12

13

14

15

16

17

18

19

20 **Key words:** natural selection, local adaptation, ecotype, *Mimulus guttatus*

21

22

23

24  
25  
26  
27  
28  
29  
30  
31  
32  
33  
34  
35  
36  
37  
38  
39  
40  
41  
42  
43  
44  
45  
46

## ABSTRACT

Identifying the environmental factors responsible for natural selection across different habitats is crucial for understanding the process of local adaptation. Despite its importance, only a few studies have successfully isolated the environmental factors driving local adaptation in nature. In this study, we evaluated the agents of selection responsible local adaptation of the monkeyflower *Mimulus guttatus* to coastal and inland habitats in California. We implemented a manipulative field reciprocal transplant experiment at coastal and inland sites, where we excluded aboveground stressors in an effort to elucidate their role in the evolution of local adaptation. We found that excluding these stressors, most likely a combination of salt spray and herbivory, completely rescued inland plant fitness when transplanted to coastal habitat. In contrast, the exclosures in inland habitat provided limited fitness benefit for either coastal or inland plants. We have previously established that low soil water availability belowground is the most important agent of selection in inland habitat. Therefore, our study demonstrates that a distinct set of selective agents are responsible for local adaptation at opposite ends of an environmental gradient.

47 **INTRODUCTION**

48 The living world is made rich with varied biological diversity. Much of that diversity is the result  
49 of natural selection acting upon variation in wild populations. Local adaptation to differing  
50 habitats plays a key role in the evolution of morphologically, physiologically, and phenologically  
51 distinct intraspecific populations (Clausen 1951; Schemske 2000; Coyne and Orr 2004). Local  
52 adaptation can be described as divergence due to contrasting environmental conditions across a  
53 species range. This often results in a tradeoff, where home populations have higher fitness than  
54 foreign populations in each habitat (Van Tienderen 1997; Kawecki and Ebert 2004). Over time,  
55 local adaptation can lead to the evolution of prezygotic and postzygotic reproductive isolating  
56 barriers among populations (Rundle 2002; Nosil 2007; Sobel *et al.* 2010). One of the most  
57 effective barriers inhibiting introgression among plants is that of ecogeographic isolation,  
58 described as the allopatric distribution of populations enforced by local adaptation to divergent  
59 ecological and edaphic regimes (Schemske 2000; Ramsey *et al.* 2003; Husband and Sabara 2004;  
60 Kay 2006; Sobel 2014). Strong divergent selection and low relative gene flow across a species  
61 range can result in the evolution of disparate ecotypes, groups of locally adapted populations that  
62 exhibit reproductive isolation, but not to the point that they would be considered separate  
63 biological species (Lowry 2012). While local adaptation is now viewed as a cornerstone of the  
64 evolution of biological diversity, surprisingly few studies have identified the key environmental  
65 variables, or selective agents, that drive its evolution.

66  
67 Almost a century has passed since Göte Turesson first introduced the concept of ecotypes  
68 (Turesson 1922). Since then, various landmark studies have introduced and popularized the use  
69 of reciprocal transplant common gardens to determine the prevalence of ecotypes in numerous

70 species (reviewed in Leimu & Fischer 2008; Hereford 2009). Most of these inquiries have  
71 primarily focused on testing the hypothesis that the ecotypes are local adapted, while little work  
72 has been done to identify the causative selective agents (Wadgymar *et al.* 2017). Typically,  
73 studies of local adaptation have made use of field or laboratory findings and an understanding of  
74 regional natural history to make predictions about potential selective agents, whether they be  
75 herbivore resistance in aspect-specific stands of *Quercus rubra* (Sork *et al.* 1993), winter  
76 temperatures in natural populations of *Arabidopsis thaliana* (Ågren and Schemske 2012), or  
77 predator avoidance via substrate crypsis in *Chaetodipus intermedius* (Hoekstra *et al.* 2005).  
78 However, many of these works have appropriately expressed caution in inferring selective agents  
79 without employing direct experimental manipulation in field reciprocal transplants. Wadgymar *et*  
80 *al.* (2017) recently surveyed the local adaptation literature for studies that identified agents of  
81 local adaptation in nature through manipulative field experiments and identified just four such  
82 studies (Williamson *et al.* 1997; Bischoff *et al.* 2006; Liancourt *et al.* 2013; Maes *et al.* 2014).  
83 Only with further manipulative field experiments can we begin to elucidate the broader causal  
84 associations between environmental selective agents and local adaptation (Cheplick 2015).  
85  
86 In this study, we conducted a manipulative field experiment to better understand the  
87 environmental variables contributing to local adaptation in the Seep Monkeyflower, *Mimulus*  
88 *guttatus*. Native to Western North American, *M. guttatus* has proven valuable to the study of  
89 ecological and evolutionary genetics (Wu *et al.* 2008; Lowry and Willis 2010; Friedman *et al.*  
90 2014; Ferris *et al.* 2016; Gould *et al.* 2017; Troth *et al.* 2018). Local adaptation has previously  
91 been demonstrated among disparate ecotypes of *M. guttatus* across California's coast-inland  
92 moisture gradient (Hall and Willis 2006; Lowry *et al.* 2008; Lowry & Willis 2010). Inland

93 populations endemic to ephemeral streams and seeps exhibit an annual life history, prioritizing  
94 seed production as a strategy to escape the seasonal summer drought (Vickery 1952; Lowry *et al.*  
95 2008). In contrast, coastal populations have adopted a perennial life history, persisting year-  
96 round in long-lived headland seeps under cooler maritime conditions (Vickery 1952). Due to  
97 delayed reproductive maturity, plants of the coastal ecotype transplanted to inland habitats fail to  
98 flower before the onset of the hot summer drought (Lowry *et al.* 2008; 2010). Though avoidance  
99 of the seasonal summer drought is likely the most important factor responsible for homesite  
100 advantage of inland populations, the agents of selection underlying homesite advantage in  
101 coastal perennial populations have not been explicitly tested.

102

103 Recent work by Kooyers *et al.* (2017) revealed a potent tradeoff between growth rate and  
104 phenylpropanoid glycoside (PPG) production (a vital class of herbivore resistance  
105 phytochemicals) in variable populations of *M. guttatus* across an altitudinal gradient. Paired with  
106 evidence that coastal perennial populations generally produce higher relative concentrations of  
107 PPGs that reduce herbivory (Holeski *et al.* 2013; Rotter *et al.* 2018), this could implicate the role  
108 of differential herbivore pressure as a biotic agent influencing divergent selection. Additionally,  
109 coastal populations have also been found to be more tolerant to salt spray (Lowry *et al.* 2008,  
110 2009), a ubiquitous abiotic stressor in coastal habitats. Despite higher levels of herbivore  
111 resistance and salt tolerance of coastal perennial populations of *M. guttatus*, it is unknown how  
112 much impact those variables have on fitness in the nature.

113

114 Here, we conducted a manipulative reciprocal transplant experiment to investigate whether the  
115 manipulations of a habitat's aboveground selective agents can restore fitness in maladapted

116 foreign ecotypes. Exclosures can buffer plants from the detrimental effects of herbivory, salt  
117 spray, wind, and adverse temperatures while holding edaphic soil characteristics constant. To  
118 narrow the list of candidate selective agents affecting fitness in the field, plots at both coastal and  
119 inland sites were protected with agrofabric exclosures. We then evaluated the fitness of both  
120 ecotypes at the end of the growing season, comparing relative performance of exclosure  
121 replicates to their controlled counterparts. This design allowed us to demonstrate that edaphic  
122 soil factors are not among those agents selecting against inland *M. guttatus* recruits in coastal  
123 habitat. Rather, some combination of aboveground agents, most likely vegetative herbivory and  
124 salt exposure, are crucial for local adaptation of the coastal populations to their native habitat.

125

126

## MATERIALS AND METHODS

### 127 **Genotype selection and growth conditions**

128 To determine what combination of selective agents contributes to differential performance in  
129 divergent *M. guttatus* genotypes along California's coast-inland moisture gradient, we conducted  
130 a manipulative reciprocal transplant experiment. To verify that these effects are replicable within  
131 ecotypes, we used accessions from two coastal perennial (SWB and MRR) and two inland  
132 annual populations (LMC and OCC). All seeds were derived from a single field mother per  
133 accession. LMC and SWB were collected in Mendocino County, CA and have been shown to be  
134 locally adapted through previous reciprocal transplant experiments (Lowry *et al.* 2008; Lowry &  
135 Willis 2010). OCC and MRR were collected from Sonoma County, CA and have not been  
136 previously utilized in field reciprocal transplant experiments (Table 1). Seeds from each  
137 accession were gathered from the wild in previous years and stored in the Lowry Lab at  
138 Michigan State University (MSU). All accessions were grown at least one generation at the MSU

139 greenhouse facilities to control for potential maternal effects and bulk seed stores. Since seed  
140 bulking can result in multiple generations of inbreeding in cataloged accessions, we chose among  
141 those inbred fewer than four generations (Table 1). Though some inbreeding depression was  
142 unavoidable, this screening allowed us to confidently negate the worst effects from our study.

143

144 **Table 1.** Geographic locations and inbreeding information of populations used in this study.

145

| Ecotype | Pop ID   | Inbred | Location                       | Latitude (N) | Longitude (W) |
|---------|----------|--------|--------------------------------|--------------|---------------|
| coastal | SWB-11-1 | 1 Gen  | Irish Beach, Mendocino Co., CA | 39° 02' 09"  | 123° 41' 25"  |
|         | MRR-13-2 | 1 Gen  | Jenner, Sonoma Co., CA         | 38° 27' 38"  | 123° 08' 45"  |
| inland  | LMC-24   | 3 Gens | Yorkville, Mendocino Co., CA   | 38° 51' 50"  | 123° 05' 02"  |
|         | OCC-31   | 2 Gens | Occidental, Sonoma Co., CA     | 38° 24' 57"  | 122° 56' 13"  |

146

147 Seeds were sown at UC Berkeley's greenhouse facilities on February 1<sup>st</sup> 2017. Each accession  
148 was sown as a lawn upon corresponding potting flats (54.28 cm L x 27.94 cm W x 6.20 cm H)  
149 filled with Sun Gro Horticulture's Sunshine Mix #1 (two trays per accession, eight in total),  
150 moistened prior to sowing with deionized (DI) water. Several hundred seeds were sown to ensure  
151 that enough germinated for the experiment. Each of the resulting eight flats were subsequently  
152 misted with DI water and stored in a cold room at 4°C to stratify. Coastal flats were relocated to  
153 the greenhouse after 10 days of stratification, while their inland counterparts remained for an  
154 additional week (17 days). Considering the rapid pace at which inland annuals mature relative to  
155 coastal perennials, staggering their relocation allowed us to align the life stages in all our  
156 genotypes – regardless of ecotype – for planting in the field. Seedlings were germinated under  
157 constant conditions, misted daily, and exposed to 16 hours of daylight. All flats were transported

158 from UC Berkeley's greenhouse facilities to the greenhouses at UC Davis' Bodega Marine  
159 Laboratory & Reserve on February 28<sup>th</sup> 2017.

160

### 161 **Reciprocal transplant design**

162 To test whether site-specific agents of natural selection select against non-native ecotypes, a  
163 reciprocal transplant common garden experiment was planted along California's coast-inland  
164 moisture gradient. Ideal coastal and inland sites were selected at two ecological reserves in  
165 Sonoma County, CA. Both gardens were planted in seeps inhabited by native populations of *M.*  
166 *guttatus*. The coastal garden was planted along a perennial seep at the southern end of Horseshoe  
167 Cove (Latitude: 38.315716°, Longitude: -123.068625°; 60.75 m from the ocean) on land  
168 managed by the UC Davis Bodega Marine Reserve (BMR) in Bodega Bay, CA (Figure 1). Our  
169 inland site was located along the margins of an ephemeral hillside seep (Latitude: 38.575545°,  
170 Longitude: -122.700851°; 39.84 km from the ocean) at the Pepperwood Preserve near Santa  
171 Rosa, CA. We established three split-plots at each field site.

172

173 All six plots were established with the following dimensions: 216 cm L x 84 cm W (Figure 2B).  
174 Plots were positioned haphazardly no farther than 2 meters apart, leaving sufficient room for data  
175 collection and plot upkeep. Each plot was cleared of native vegetation prior to transplantation,  
176 simulating an artificial landslide event, which are common in California's headland bluffs  
177 (Collins & Sitar 2008). All plots were subdivided into two 108 cm L x 84 cm W subplots (6 per  
178 site, 12 total) and randomly assigned a treatment: enclosure or shade control (see details of  
179 treatments below).

180



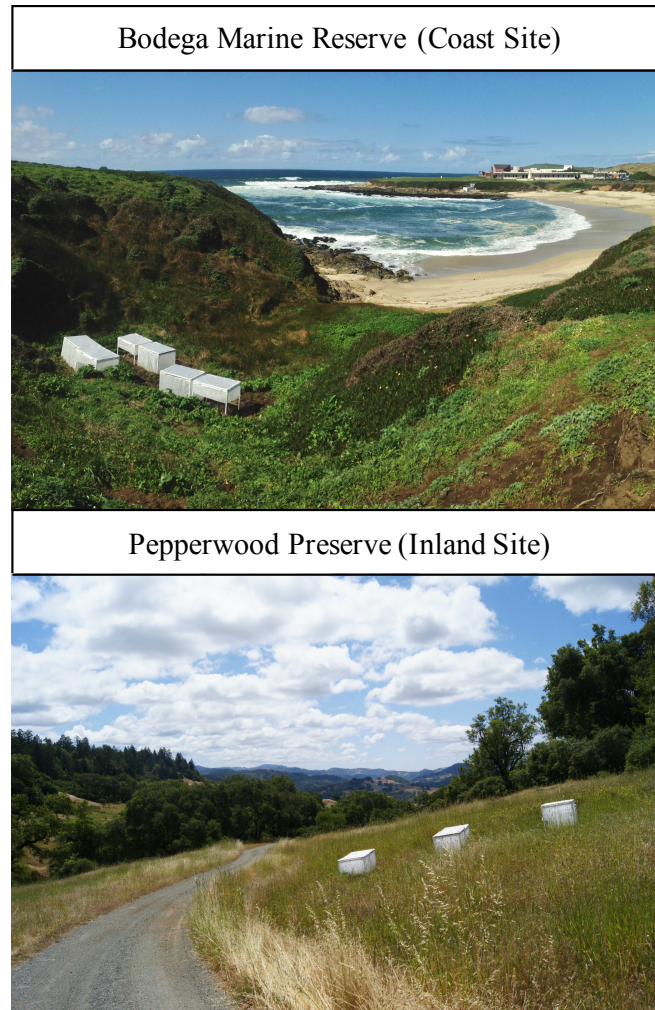

181

182 **Figure 1.** Photos of reciprocal transplant field sites in Sonoma County, CA. The coast garden  
183 was located in a perennial seep running from the bluffs overlooking Horseshoe Cove, down to  
184 the sandy shoreline of the Pacific Ocean. The inland garden was planted along the margins of a  
185 seasonal seep in the Mayacamas Mountains, CA.

186

187 We transplanted biological replicates at both coastal and inland sites a week after the plants were  
188 relocated to the BMR greenhouses (March 8<sup>th</sup> 2017). All *M. guttatus* seedlings utilized in this  
189 study were left to mature to the four-leaf stage prior to planting to best ensure transplant success,  
190 but still assess field survival prior to reproduction. 25 replicates per population were planted

191 haphazardly in a grid within each designated subplot (100 per subplot, 200 per plot, 600 per site,  
192 and 1200 total). In all, 26 individuals died within a week of the initial planting (primarily inland  
193 replicates at the inland site) and were replaced immediately. All losses within the first week of  
194 planting were considered a result of transplant shock, thus justifying swift replacement.

195

## 196 **Environmental manipulations**

197 To test the combinatorial effects of coastal conditions on population mean fitness, we  
198 constructed multiple exclosures with the intent of excluding the aboveground stressors unique to  
199 each site – including transient herbivores and oceanic salt spray. Three replicate exclosures (108  
200 cm L x 84 cm W x 87 cm H; Figure 2A) were installed at each site (six total) after planting. PVC  
201 pipes were used to construct the scaffold of each shelter, consisting of both a ground level and  
202 waist height rectangular quadrat attached at each corner by four PVC legs. All joints were  
203 reinforced with PVC cement to improve overall rigidity to withstand wind. A third quadrat was  
204 mounted with door hinges on the topside of the scaffold to be used as a lid for plot upkeep and  
205 data collection. To ensure that biological replicates were sufficiently buffered from the elements,  
206 the lid and scaffold of all exclosures were enclosed using medium weight agrofabric – ordered  
207 from OBC Northwest, Inc. (Pro-34 1.0 oz./sq. yd. with 70% light transmission). Agrofabric was  
208 also applied to the top two thirds of the shade control shelters, leaving the plants exposed to  
209 aboveground stressors, while reducing light in a similar way as the exclosures. All holes made in  
210 the agrofabric as a result of the zip ties used to fasten them were reinforced with clear repair  
211 tape. Lids were sealed to prevent aboveground herbivore intrusion by installing industrial  
212 strength VELCRO brand tape strips along the lip of each exclosure. We buried the exclosures in  
213 the ground from 8 - 13 cm, depending on location, to limit herbivore entry through the soil.

214

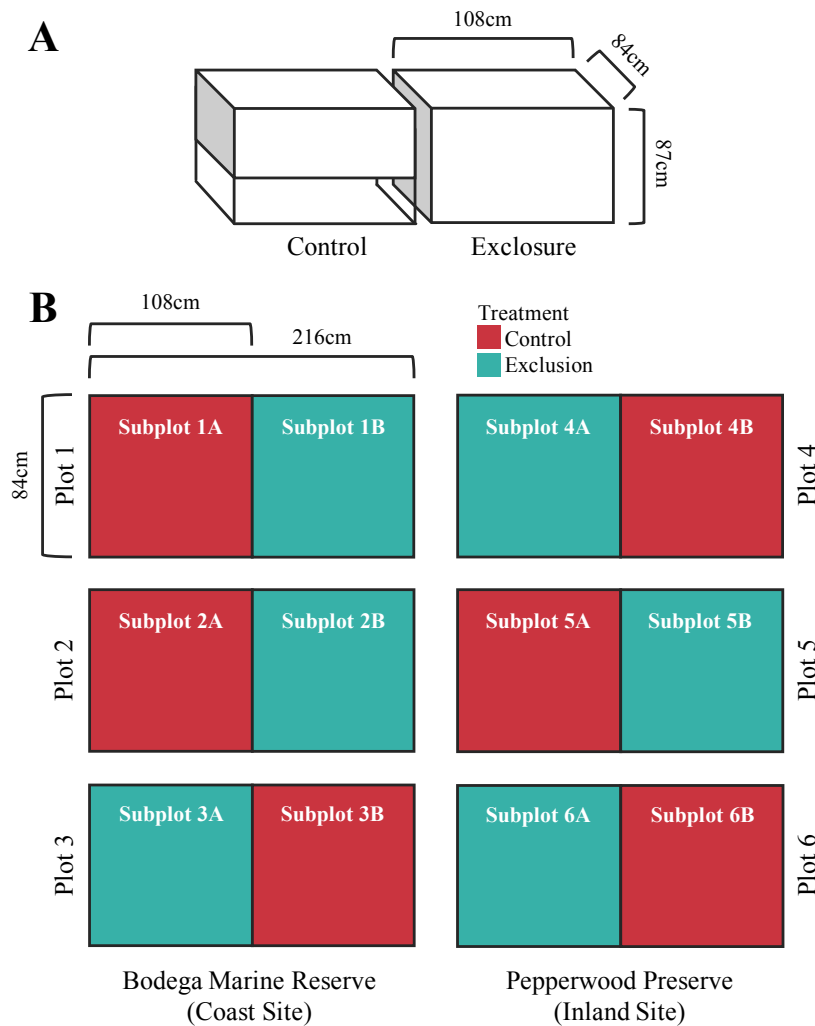

215

216 **Figure 2.** (A) Dimensions of enclosures and shade control shelters used in this study. (B) A

217 diagram of the split-plot design for both coastal and inland sites.

218

### 219 **Effects of field manipulations on fitness**

220 Due to concerns by staff of the field reserves about the potential for introgression of nonnative

221 genes into the local gene pools, all plants were regularly emasculated. This practice eliminated

222 the possibility of using flower number or seed set as measures of fitness in this study. Despite

223 this complication, previous studies on local adaptation in this system demonstrates that selection

224 is strong enough for survival to be a sufficient fitness measurement in coastal habitats (Lowry et  
225 al. 2008; Lowry & Willis 2010). Thus, to study the effects of habitat and enclosure on the  
226 performance of both ecotypes, we collected survival data at seven time points throughout the  
227 growing season. All aboveground *M. guttatus* vegetation (dead or alive) of each plant was  
228 harvested into brown paper bags at the end of the experiment (June 13<sup>th</sup> – 15<sup>th</sup>, 2017). These  
229 samples were shipped to Michigan State University where they were dried in an oven at 60°C for  
230 2 weeks. Each sample was weighed with an analytical balance to quantify dry aboveground  
231 biomass, a valuable but imperfect indicator of plant performance and fecundity (Younginger *et*  
232 *al.* 2017).

233  
234 To test for differential exposure of aerosolized salt spray across treatments at the coast site, salt  
235 traps were designed and installed among all plots roughly following Yura (1997) and Yura &  
236 Ogura (2006). In total, 6 salt traps were deployed at the coast site (one per subplot) and 2 traps at  
237 the inland site (one per treatment). Traps consisted of a four-sided rectangular plastic prism  
238 attached to a cylindrical post. Clear vinyl badge holders were clipped upon each face (one per  
239 cardinal direction) to act as protective sheaths for Whatman Brand #2 Qualitative Medium filter  
240 paper inserts (cut to size: 8.6 cm L x 5.8 cm W). Badge holders have a native cutout to allow the  
241 filter paper to absorb all incident salt spray. Traps were left to collect salt for two weeks starting  
242 on May 7<sup>th</sup>, 2017 (24 coastal / 8 inland inserts) and then the filter papers were collected into  
243 individual ziplock bags, labelled, and transported back to Michigan State University. Inserts  
244 were left to air-dry for 24 hours, placed in Erlenmeyer flasks (1 per trap, 8 total) to soak in 50 ml  
245 ultrapure water, and shaken for 1 hour to extract salts. Samples were filtered of all resulting

246 fibers and debris with Whatman No. 44 filter paper and subsequently analyzed for sodium using  
247 inductively coupled plasma optical emission spectrometry (ICP-OES; Olesik 1991).

248

249 To quantify the degree to which our exclosures affected herbivore activity, we kept a detailed  
250 record of how many replicates had experienced any herbivore damage throughout the extent of  
251 our experiment. At the end of the season, all plants were categorized as having experienced  
252 herbivory or being unscathed by herbivores. Any replicate that died prior to the accumulation of  
253 any obvious herbivore related injuries were not counted as having experienced herbivory. We ran  
254 a general linear model (GLM) using a binomial distribution to analyze herbivory in the context  
255 of presence / absence. Separate models were run for each site. No random effects were evaluated  
256 here, as the goal was simply to determine whether the exclosure treatment had indeed effectively  
257 reduced the incidence of herbivory at either site.

258

### 259 **Analysis of transplant data**

260 To confirm whether some combination of aboveground stressors contribute to fitness across  
261 transplant sites, our data were analyzed using an ASTER modeling approach (Geyer *et al.* 2007;  
262 Shaw *et al.* 2008). ASTER is a module developed for the statistical program R that provides a  
263 powerful tool for combining multiple fitness components with different probability distributions  
264 into a single analysis. The power of ASTER lies in its ability to calculate an expected fitness  
265 value for all biological replicates given the order and interdependence of each fitness component.  
266 We used ASTER to analyze a composite of 8 fitness components: survival to weeks 1 – 7, all  
267 modeled as Bernoulli (0 or 1), and the final harvested aboveground biomass, here modeled as a  
268 normal distribution. Due to coding constraints in ASTER, any replicates with a non-zero mass

269 that died before the final observation date (measured post mortem) were scored as a zero for  
270 biomass. Likelihood ratio tests were constructed by comparing nested null models to test  
271 alternative hypotheses.

272  
273 We employed a generalized linear mixed modeling approach (GLMM) separately, as an  
274 alternative to ASTER because the ASTER module does not readily allow for mixed models with  
275 random effects. Thus, the GLMM approach aided us in confirming our ASTER results. Site  
276 specific models were developed in lieu of a more comprehensive model, as we were less  
277 interested in the effects of site on fitness, but rather the effects of treatment within each site.  
278 Response variables included survival to harvest (week 7), modeled using a binomial distribution,  
279 and total biomass accrued. Since there is no proper modeling distribution for zero-inflated  
280 continuous data in the GLMM framework (data ASTER is quite useful at dealing with), we  
281 treated all zero biomass values as missing data and removed them from the analysis. Analysis of  
282 the remaining individuals was modeled using a gamma distribution. The following GLMM  
283 scaffold was developed for all combinations of site and response (4 models in total): Response ~  
284 Treatment + Ecotype + Treatment:Ecotype + (1|Plot) + (1|Accession). While both ASTER and  
285 GLMM modeling approaches have limitations, they complement each other's weaknesses and  
286 together can increase the confidence in interpretation of results.

287

## 288 **RESULTS**

### 289 **General patterns across field sites and treatments**

290 Overall, 89% of transplants survived to harvest at Pepperwood (inland site) and 73% survived at  
291 Bodega Bay (coastal site). Enclosures and control subplots at the inland site saw comparable

292 survival rates, with 90% in the former and 88% in the latter. However, survival diverged  
293 markedly at the coastal site with 97% survival in exclosures and 49% in shade control subplots.  
294 This vast disparity is driven mostly by discrepancies in ecotype performance dependent on  
295 subplot treatment. Plants at the inland site were generally small, having an average biomass of  
296 about 0.07g. In contrast, plants at the coastal site had robust growth, ending the season with an  
297 average biomass of 1.16g.

298

### 299 **Coastal field site**

300 There were striking differences in the responses of coastal and inland accessions to the exclosure  
301 treatment at the coastal field site. At the coast, 87% fewer inland control replicates survived until  
302 the end of the experiment than the coastal control plants. The few inland individuals that did  
303 survive in the control plants were generally small (Fig. 3A,B). In contrast, the inland plants  
304 within exclosures experienced nearly the same survival rates and had a similar mean biomass as  
305 coastal replicates under either treatment (Fig. 3A,B). Our GLMM approach found a significance  
306 of ecotype x treatment interaction at the coast field site ( $P < 0.0001$ ; Table 2), confirming that  
307 differential fitness performance between ecotypes was dependent on treatment.

308

309 ASTER modeling generally confirmed the patterns found by GLMM analysis. Not only were  
310 there strong treatment effects at the coastal field site ( $P < 0.0001$ ; Table 3), but treatment was  
311 also found to significantly affect expected biomass for each ecotype ( $P < 0.0001$ ; Table 3).

312 Although the exclosure treatment led to an increase in the expected mean vegetative biomass of  
313 both ecotypes at the coastal site, the response of inland plants to the treatment was much more  
314 dramatic. This is most evident in Figure 4A, where inland exclosure replicates have accrued an

315 expected mean biomass of 1.58g while inland plants in the control plots had a negative expected  
316 biomass (-1.33g) due primarily to low survival.  
317

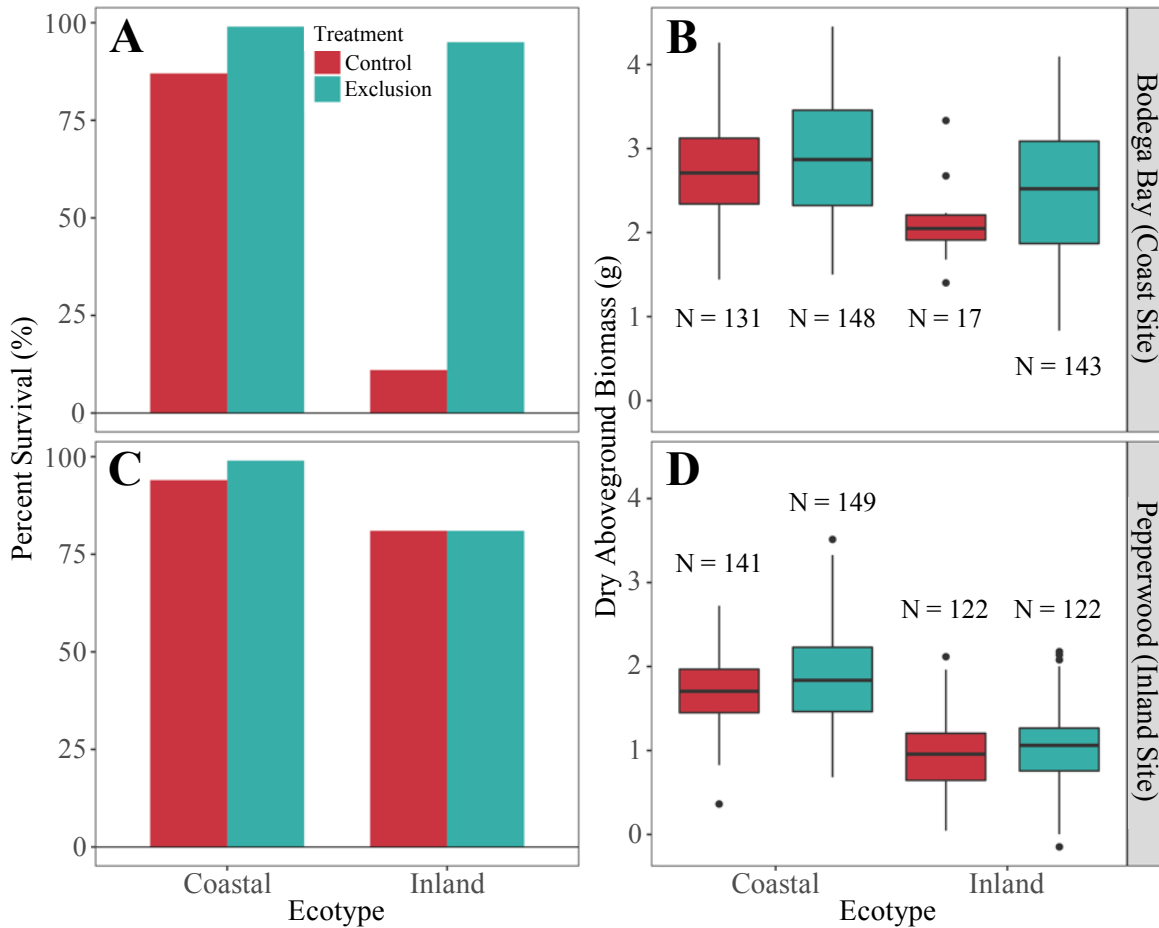

318  
319 **Figure 3.** Survival and dry aboveground biomass were measured as fitness proxies in all  
320 replicates across both reciprocal transplant gardens to model the effect of ecotype, treatment, and  
321 ecotype x treatment interactions on in situ performance. Percent survival is displayed in bar plots  
322 specific to the coast (A) and inland (C) sites. Box and whisker plots of dry aboveground biomass  
323 at the coast (B) and inland (D) sites for plants that survived to harvest ( $N$  = sample size of  
324 surviving individuals).  
325



326 **Table 2.** Results for the following Generalized Linear Mixed Model (GLMM): Response ~  
 327 Treatment + Ecotype + Treatment:Ecotype + (1|Plot) + (1|Accession). The *P* values for main  
 328 effects and interactions are provided.

| Site   | Response Variable       | Treatment  | Ecotype    | Ecotype x Treatment |
|--------|-------------------------|------------|------------|---------------------|
| coast  | survival to harvest     | 0.0005***  | <0.0001*** | <0.0001***          |
|        | dry aboveground biomass | <0.0001*** | 0.10312    | 0.0398*             |
| inland | survival to harvest     | 0.0337*    | 0.0015**   | 0.0408*             |
|        | dry aboveground biomass | <0.0001*** | <0.0001*** | 0.0308*             |

329 \**P*<0.05, \*\**P*<0.01, \*\*\**P*<0.001

330

### 331 **Inland field site**

332 Ecotype, treatment, and ecotype x treatment interaction all had a significant effect on survival  
 333 and biomass at the inland site (Table 2). However, the magnitude of these differences was  
 334 relatively small, with a 19% difference in survival between ecotypes and a 3% difference in  
 335 survival between the treatments. There were significant effects of ecotype on survival (*P* =  
 336 0.0015; Table 3) and biomass (*P* < 0.0001; Table 2). Coastal replicates both survived in greater  
 337 numbers and produced more vegetative biomass than their inland counterparts (Fig. 3C,D).  
 338 Regardless of these differences, the vast majority plants at this site still survived to harvest.

339

340 There was no significant effect of treatment in our ASTER models (*P* = 0.1376; Table 4).  
 341 However, the ecotype x treatment interaction was significant for biomass (*P* < 0.0001; Table 4).  
 342 This interaction is the result of an almost three-fold difference in expected biomass between  
 343 treatments, with exclosure biomass being greater than that of our control plots (Figure 4B).

344

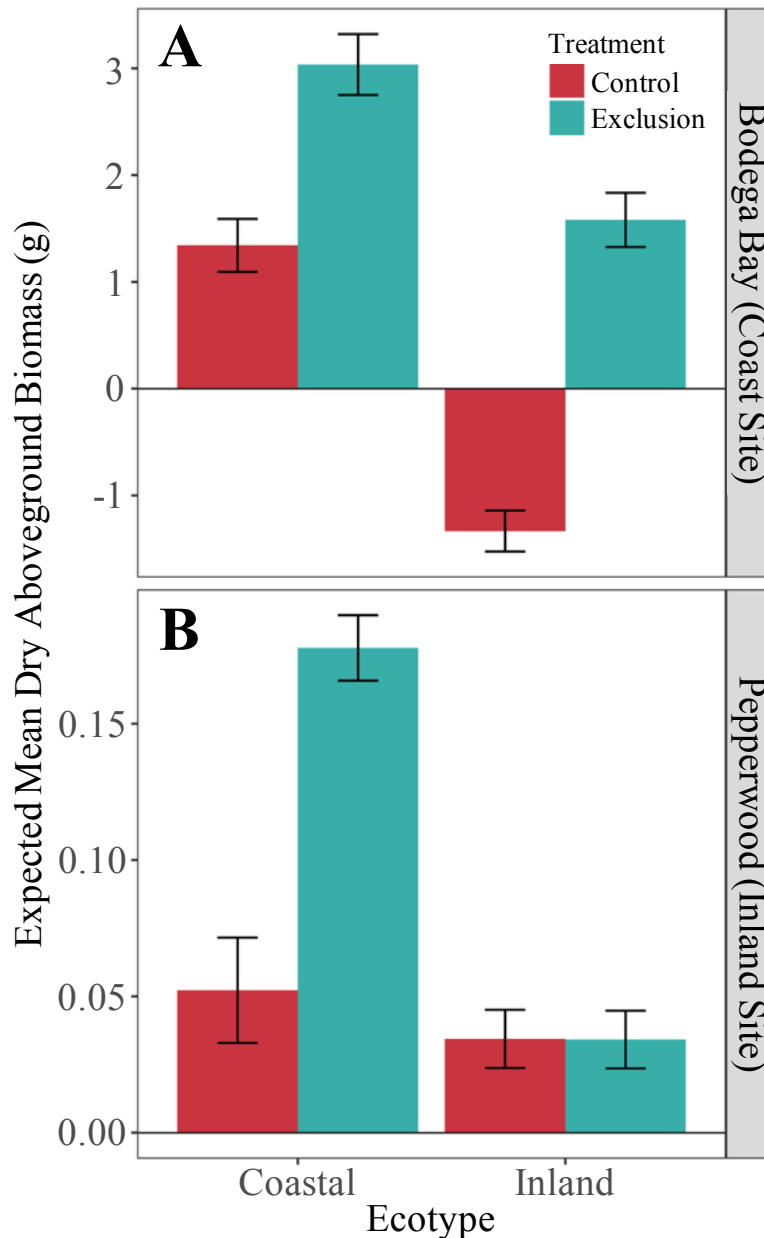

345

346 **Figure 4.** Expected mean dry aboveground biomass of all harvested replicates at the coast (A)  
347 and inland (B) sites from the ASTER analysis. Here, expected biomass accounts for the  
348 combination of survival with final dry aboveground biomass. A negative expected mean can  
349 arise if enough mortality is observed in any particular treatment group. All error bars denote one  
350 standard error. Note that scales are different.

351

352 **Table 3.** Analysis of treatment and treatment-by-ecotype interactions using an ASTER-based  
 353 modeling approach. Our ASTER models analyzed a composite of eight fitness components,  
 354 including survival from weeks 1 – 7 and a post-harvest measure of dry aboveground biomass.  
 355 These components were aligned in the following directional graph in order of general causality:  
 356 survival to week 1 → survival to week 2 → survival to week 3 → survival to week 4 → survival  
 357 to week 5 → survival to week 6 → survival to week 7 → biomass accrued. All factors were  
 358 tested by likelihood ratio tests using nested null models.

| Site   | Factor Tested       | Null | Alternative | Null     | Alternative | Test | Test     | Test p     |
|--------|---------------------|------|-------------|----------|-------------|------|----------|------------|
|        |                     | df   | df          | Deviance | Deviance    | df   | Deviance | Value      |
| coast  | Treatment           | 9    | 10          | -1048.00 | -930.70     | 1    | 117.330  | <0.0001*** |
|        | Ecotype x Treatment | 10   | 11          | -930.70  | -903.31     | 1    | 27.385   | <0.0001*** |
| inland | Treatment           | 9    | 10          | -541.45  | -539.24     | 1    | 2.205    | 0.1376     |
|        | Ecotype x Treatment | 10   | 11          | -539.24  | -503.36     | 1    | 35.887   | <0.0001*** |

359 \*\*\* $P < 0.001$ .

360

### 361 **Quantifying salt spray and herbivory**

362 Quantifying the concentration of accumulated sodium allowed us to establish whether our  
 363 exclosures had any significant effect on incident salt spray levels in control vs. exclosure plots.  
 364 Sodium concentrations were found to be elevated in the ambient conditions of control subplots at  
 365 the coastal site in comparison to any other combination of treatment and site (Figure 5). Salt  
 366 samples collected from coastal control subplots had nearly a two-fold higher level of sodium  
 367 over those sheltered within exclosures. There did not appear to be any difference between the

368 control or exclosure treatments at the inland site. Analysis of a 2% nitric acid blank and clean  
369 filter control revealed that our solvent and filter slips had small-to-negligible effects on the  
370 sodium content of our test samples. This verifies a pattern of ambient salt reduction as a  
371 consequence of our exclosure installations.  
372

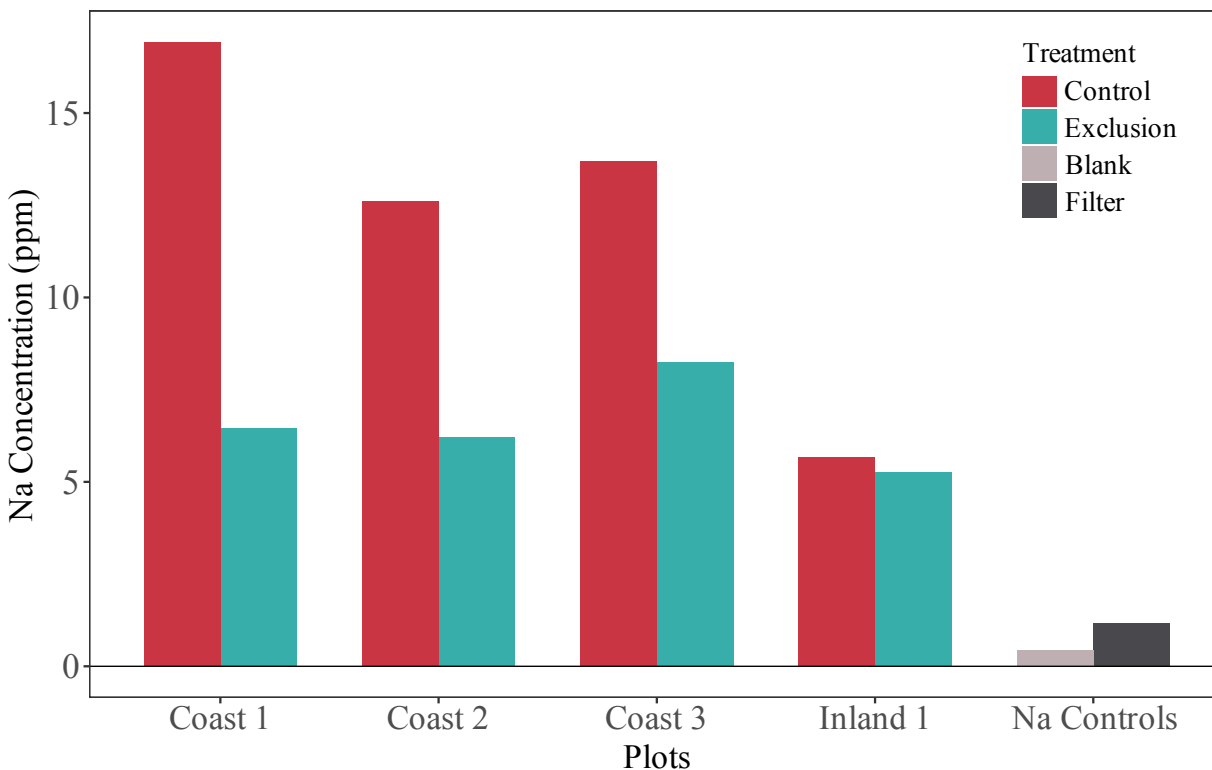

373  
374 **Figure 5.** Sodium (Na) concentrations in ppm of all salt trap filter slips left in the field for two  
375 weeks, measured using inductively coupled plasma optical emission spectrometry (ICP-OES).  
376 Control samples were subject to elements native to each site and plot microhabitat. Exclusion  
377 samples were installed within the bounds of their respective exclosure. A blank sample was run  
378 consisting only of 2% nitric acid. To gauge whether Na levels were altered in the presence of  
379 filter slips, an unadulterated filter control was also analyzed. All coastal plots and one of three  
380 total inland plots are shown.

381 Similar to our sodium analyses, quantifying the incidence of herbivory confirmed the  
382 effectiveness of our exclosures. Treatment had a significant effect on herbivory at the coastal site  
383 ( $P < 0.0001$ ), nearly eliminating the incidence of herbivore damage to the plants within the  
384 exclosures (Table 4). Neither the ecotype nor ecotype x treatment interaction had a significant  
385 effect on herbivory at the coast. Though nearly a quarter of coastal and inland controls  
386 experienced some herbivore damage at the coast site, there were few observed instances of  
387 herbivory at the inland site regardless of treatment (Table 4). In contrast to the coast site, there  
388 was no evident effect of treatment on the incidence of herbivory at the inland site ( $P = 0.8105$ ).  
389 Only ecotype had a significant effect on rate of herbivore damage ( $P = 0.0189$ ), although how  
390 meaningful this was given the low level of herbivory is doubtful (Table 4).

391

392 **Table 4.** Percentage of plants that experienced herbivory across sites and treatments. %

393 Herbivorized was calculated by dividing the final number of herbivorized plants by the total  
394 present in each treatment group.

| Site   | Ecotype | Treatment | % Herbivorized |
|--------|---------|-----------|----------------|
| coast  | coastal | exclosure | 0              |
|        |         | control   | 28             |
|        | inland  | exclosure | 0              |
|        |         | control   | 29             |
| inland | coastal | exclosure | 0              |
|        |         | control   | 7              |
|        | inland  | exclosure | 1              |
|        |         | control   | 1              |

395  
396  
397  
398  
399  
400  
401  
402  
403  
404  
405  
406  
407  
408  
409

## DISCUSSION

Our results confirm that some combination of aboveground stressors contributes to the adaptive divergence of coastal perennial and inland annual ecotypes of the Seep Monkeyflower, *M. guttatus*. While coastal conditions strongly favor the persistence of native genotypes, nonnative inland accessions at the coastal site were shown to be rescued by enclosure treatments. The effect was so strong that fitness was not merely restored, they thrived at levels comparable to their coastal adapted congeners. Our results suggest that coastal populations have likely adapted primarily to withstand the adverse effects of aboveground selective agents including oceanic salt spray and higher levels of herbivory. In contrast, previous studies have found that local adaptation inland annual populations of *M. guttatus* are likely primarily driven by escape, through earlier flowering, from low belowground soil water availability that occurs during the seasonal summer drought (Lowry *et al.* 2008; Hall *et al.* 2010; Lowry & Willis 2010). Together, these results demonstrate that different selective agents are responsible for local adaptation at opposite ends of an environmental gradient.

### **Patterns of local adaptation**

The most significant result of our study was the striking effect of the enclosure on survival and biomass of inland annual transplants at the coastal field site, despite sharing the edaphic conditions of neighboring control replicates. These enclosures ameliorated all of the detrimental effects of natural selection on non-native transplants at the coastal field site. In contrast, the enclosures did not have nearly as great an effect at the inland field site, where coastal perennial plants survived at similar levels as inland annuals. Our analyses demonstrate that a simple control of aboveground stressors in the field can overcome the environmental variables that limit

418 inland fitness at the coastal field site. Thus, some suite of aboveground agents causes the  
419 selection that maintains local adaptation of coastal populations of *M. guttatus*.

420  
421 The effect of our treatment at the inland field site was unexpected, since hypothesized agents of  
422 selection like salt spray are not a factor in this habitat and rates of herbivory are much lower. The  
423 elevated biomass of the coastal perennial transplants within enclosure were most exaggerated in  
424 two of the three inland plots, coinciding with enclosure subplots planted closer to the interior of  
425 the seep where soil moisture levels remains favorable for longer. While this result could be an  
426 artifact of experimental setup, the same trend was not evident among inland plants. Therefore, it  
427 may be that an unknown aboveground set of selective agent limits the performance of coastal  
428 transplants in inland habitats. Future studies conducting detailed quantification of herbivory and  
429 other factors will be needed to draw any conclusions about mechanism.

430  
431 In contrast to previous findings on this system, survival of both native and non-native genotypes  
432 at the inland site remained comparable throughout the entire growing season. While this result  
433 appears to be at odds with local adaptation, it was expected. We have shown in previous studies  
434 that despite the consistent performance of coastal transplants early in the growing season at  
435 inland field sites, nearly all are killed by the low soil water availability of the summer drought  
436 before they have the opportunity to flower (Hall et al. 2006; Lowry et al. 2008; Hall et al. 2010;  
437 Lowry & Willis 2010). Fast growing inland annuals survive to flower at very high rates at inland  
438 field sites. Thus, by ending the experiment before the summer drought, our results did not  
439 capture selection imposed by seasonal drought.

440

441 **Salt spray and herbivory as agents of selection at the coastal field site**

442 Salt stress, whether derived from topical incidence or root uptake, can have a range of adverse  
443 effects on plants (Boyce 1954; Humphreys 1982; Griffiths 2006). However, coastal populations  
444 of *M. guttatus* – often occurring within a few meters of the wavebreak – are known to have a  
445 higher tolerance to topical salt application than inland plants (Lowry *et al.* 2008, 2009). The  
446 majority of inland replicates in the control plots at the coast site experienced complete vegetative  
447 loss consistent with leaf necrosis due to salt spray. Few inland controls persisted long enough to  
448 successfully form floral buds. Further, among all bolting survivors, floral stalks and lateral  
449 branches turned brown and produced no healthy flowers, likely as a result of salt spray exposure.  
450 Similar instances of premature vegetative senescence were noted in inland replicates within  
451 coastal enclosures, but this damage was only limited to those tissues in direct contact with the  
452 agrofabric. This tissue was presumably experiencing salt stress as a consequence of contact with  
453 oceanic salt that had accumulated on the walls of the enclosure barriers.

454  
455 Our field observations revealed significantly higher rates of herbivory among control replicates  
456 of all genotypes at the coast field site, demonstrating the exclusionary power of our agrofabric  
457 treatments. Yet there appeared to be no apparent bias towards one ecotype over another. At least  
458 for the field season in which we conducted the experiment, mammalian predation by resident  
459 California Voles (*Microtus californicus*) made up a significant portion of damage done to control  
460 replicates at the coast – most often evidenced by the complete removal of floral stalks and  
461 branches. Though plants in the coastal control plots experienced more herbivory than the plants  
462 in the enclosures, it did not appear widespread enough to be the sole explanation for such striking  
463 fitness differentials across treatments. Overall, some combination of herbivory and salt spray



464 have clearly contributed to local adaptation of coastal populations of *M. guttatus*. However, we  
465 cannot parse the relative importance of these two factors without further manipulative field  
466 experiments.

467

## 468 ACKNOWLEDGEMENTS

469

470 The authors thank Benjamin Blackman, Erin Patterson, and the University of California Berkeley  
471 greenhouse staff for tending to our germinants, the Pepperwood Foundation Staff, most  
472 especially Michelle Halbur, Michael Gillogly, Sonja Barringer, Sloane Shinn, and  
473 President/CEO Lisa Micheli for graciously hosting our inland transplants, the staff and faculty of  
474 the University of California Davis Bodega Marine Laboratory & Reserve, notably Jacqueline  
475 Sones, Kitty Brown, Lisa Valentine, Suzanne Olyarnik, and Director Gary Cherr for providing  
476 accommodations for both our coastal transplants and field researchers, to Ruth Shaw, Marcus  
477 Warwell, and Christopher Warneke for their attentive modeling advice, and a heartfelt thank you  
478 to Kathy Severin for her aid and expertise on the ICP-OES. Comments, insight, and suggestions  
479 by William Wetzel, Marjorie Weber, Jeffrey Conner, Diane Ebert-May, Billie Gould, and Nate  
480 Emery were essential to the planning and execution of this project. We especially wish to thank  
481 Daniel Jackson and Patrick Kearns for their assistance in the field and resilient disposition during  
482 the most laborious stretches. Funding was provided by the Michigan State University Plant  
483 Science Fellowship and the Lowry Lab Startup Fund.

484

485

486

487

488

489

490

491

492

493

494

495

496

497

498

499

500

#### LITERATURE CITED

501

502

503 Agren, J., & Schemske, D. W. (2012). Reciprocal transplants demonstrate strong adaptive

504 differentiation of the model organism *Arabidopsis thaliana* in its native range. *New Phytologist*,

505 *194*, 1112-1122.

506

507 Bischoff, A., Cremieux, L., Smilauerova, M., Lawson, C. S., Mortimer, S. R., Dolezal, J., Lanta

508 V., Edwards, A. R., Brook, A. J., Macel, M., Leps, J., Steinger, T., Muller-Scharer, H. (2006).

509 Detecting local adaptation in widespread grassland species - the importance of scale and local  
510 plant community. *Journal of Ecology*, 94, 1130-1142.  
511  
512 Boyce, S. G. (1954). The Salt Spray Community. *Ecological Monographs*, 24, 29-67.  
513  
514 Cheplick, G. P. (2015). *Approaches to plant evolutionary ecology*. Oxford University Press,  
515 Oxford, UK.  
516  
517 Clausen, J. (1951). *Stages in the evolution of plant species*. Cornell University Press, Ithaca ,  
518 NY.  
519  
520 Collins, B. D., & Sitar, N. (2008). Processes of coastal bluff erosion in weakly lithified sands,  
521 Pacifica, California, USA. *Geomorphology*, 97, 483-501.  
522  
523 Coyne, J. A., & H. A. Orr. 2004. *Speciation*. Sinauer Associates, Inc, Sunderland , MA.  
524  
525 Ferris, K. G., Barnett, L. L., Blackman, B. K., & Willis, J. H. (2017). The genetic architecture of  
526 local adaptation and reproductive isolation in sympatry within the *Mimulus guttatus* species  
527 complex. *Molecular Ecology*, 26, 208-224.  
528  
529 Friedman, J., Twyford, A. D., Willis, J. H., & Blackman, B. K. (2015). The extent and genetic  
530 basis of phenotypic divergence in life history traits in *Mimulus guttatus*. *Molecular Ecology*, 24,  
531 111-122.

532

533 Geyer, C. J., Wagenius, S., & Shaw, R. G. (2007). Aster models for life history analysis.

534 *Biometrika*, 94, 415-426.

535

536 Gould, B. A., Chen, Y. N., & Lowry, D. B. (2017). Pooled ecotype sequencing reveals candidate  
537 genetic mechanisms for adaptive differentiation and reproductive isolation. *Molecular Ecology*,

538 26, 163-177.

539

540 Griffiths, M. E. (2006). Salt spray and edaphic factors maintain dwarf stature and community  
541 composition in coastal sandplain heathlands. *Plant Ecology*, 186, 69-86.

542

543 Hall, M. C., & Willis, J. H. (2006). Divergent selection on flowering time contributes to local  
544 adaptation in *Mimulus guttatus* populations. *Evolution*, 60, 2466-2477.

545

546 Hall, M. C., Lowry, D. B., Willis J. H. (2010) Is local adaptation in *Mimulus guttatus* caused by  
547 trade-offs at individual loci? *Molecular Ecology*, 19, 2739-2753.

548

549 Hereford, J. (2009). A quantitative survey of local adaptation and fitness trade-offs. *American*  
550 *Naturalist*, 173, 579-588.

551

552 Hoekstra, H. E., Krenz, J. G., & Nachman, M. W. (2005). Local adaptation in the rock pocket  
553 mouse (*Chaetodipus intermedius*): natural selection and phylogenetic history of populations.

554 *Heredity*, 94, 217-228.

555

556 Holeski, L. M., Keefover-Ring, K., Bowers, M. D., Harnenz, Z. T., & Lindroth, R. L. (2013).  
557 Patterns of phytochemical variation in *Mimulus guttatus* (Yellow Monkeyflower). *Journal of*  
558 *Chemical Ecology*, *39*, 525-536.

559

560 Humphreys, M. O. (1982). The Genetic-Basis of Tolerance to Salt Spray in Populations of  
561 *Festuca rubra* L. *New Phytologist*, *91*, 287-296.

562

563 Husband, B. C., & Sabara, H. A. (2004). Reproductive isolation between autotetraploids and  
564 their diploid progenitors in fireweed, *Chamerion angustifolium* (Onagraceae). *New Phytologist*,  
565 *161*, 703-713.

566

567 Kawecki, T. J., & Ebert, D. (2004). Conceptual issues in local adaptation. *Ecology Letters*, *7*,  
568 1225-1241.

569

570 Kay, K. M. (2006). Reproductive isolation between two closely related hummingbird-pollinated  
571 neotropical gingers. *Evolution*, *60*, 538-552.

572

573 Kooyers, N. J., Blackman, B. K., & Holeski, L. M. (2017). Optimal defense theory explains  
574 deviations from latitudinal herbivory defense hypothesis. *Ecology*, *98*, 1036-1048.

575

576 Leimu, R., & Fischer, M. (2008). A meta-analysis of local adaptation in plants. *PLoS One*, *3*,  
577 e4010.

578

579 Liancourt, P., Spence, L. A., Song, D. S., Lkhagva, A., Sharkhuu, A., Boldgiv, B., Helliker, B.  
580 R., Petraitis, P. S., & Casper, B. B. (2013). Plant response to climate change varies with  
581 topography, interactions with neighbors, and ecotype. *Ecology*, *94*, 444-453.

582

583 Lowry, D. B. (2012). Ecotypes and the controversy over stages in the formation of new species.  
584 *Biological Journal of the Linnean Society*, *106*, 241-257.

585

586 Lowry, D. B., Hall, M. C., Salt, D. E., & Willis, J. H. (2009). Genetic and physiological basis of  
587 adaptive salt tolerance divergence between coastal and inland *Mimulus guttatus*. *New*  
588 *Phytologist*, *183*, 776-788.

589

590 Lowry, D. B., Rockwood, R. C., & Willis, J. H. (2008). Ecological reproductive isolation of  
591 coast and inland races of *Mimulus guttatus*. *Evolution*, *62*, 2196-2214.

592

593 Lowry, D. B., & Willis, J. H. (2010). A widespread chromosomal inversion polymorphism  
594 contributes to a major life-history transition, local adaptation, and reproductive isolation. *PLoS*  
595 *Biology*, *8*, e1000500.

596

597 Maes, S. L., De Frenne, P., Brunet, J., de la Pena, E., Chabrierie, O., Cousins, S. A. O., Decocq,  
598 G., Diekmann, M., Gruwez, R., Hermy, M., Kolb, A., Verheyen, K. (2014). Effects of enhanced  
599 nitrogen inputs and climate warming on a forest understorey plant assessed by transplant  
600 experiments along a latitudinal gradient. *Plant Ecology*, *215*, 899-910.

601

602 Nosil, P. (2007). Divergent host plant adaptation and reproductive isolation between ecotypes of  
603 *Timema cristinae* walking sticks. *American Naturalist*, *169*, 151-162.

604

605 Olesik, J. W. (1991). Elemental analysis using ICP-OES and ICP/MS. *Analytical Chemistry*, *63*,  
606 12A-21A.

607

608 Ramsey, J., Bradshaw, H. D., & Schemske, D. W. (2003). Components of reproductive isolation  
609 between the monkeyflowers *Mimulus lewisii* and *M. cardinalis* (Phrymaceae). *Evolution*, *57*,  
610 1520-1534.

611

612 Rotter, M. C., J. J. Couture, E. M. Rothwell, J. Garcia, and L. M. Holeski. 2018. Evolutionary  
613 ecology of plant resistance traits across the herbivore diet spectrum: A test in the model plant  
614 *Mimulus guttatus*. *Evolutionary Ecology Research*, *19*, 423-440.

615

616 Rundle, H. D. (2002). A test of ecologically dependent postmating isolation between sympatric  
617 sticklebacks. *Evolution*, *56*, 322-329.

618

619 Schemske, D. W. 2000. Understanding the origin of species. *Evolution*, *54*, 1069–1073.

620

621 Shaw, R. G., Geyer, C. J., Wagenius, S., Hangelbroek, H. H., & Etterson, J. R. (2008). Unifying  
622 life-history analyses for inference of fitness and population growth. *American Naturalist*, *172*,  
623 E35-E47.

624

625 Sobel, J. M. (2014). Ecogeographic isolation and speciation in the genus *Mimulus*. *American*  
626 *Naturalist*, 184, 565-579.

627

628 Sobel, J. M., Chen, G. F., Watt, L. R., & Schemske, D. W. (2010). The biology of speciation.  
629 *Evolution*, 64, 295-315.

630

631 Sork, V. L., Stowe, K. A., & Hochwender, C. (1993). Evidence for local adaptation in closely  
632 adjacent subpopulations of northern Red Oak (*Quercus rubra* L) expressed as resistance to leaf  
633 herbivores. *The American Naturalist*, 142, 928-936.

634

635 Troth, A., Puzey, J. R., Kim, R. S., Willis, J. H., & Kelly, J. K. (2018). Selective trade-offs  
636 maintain alleles underpinning complex trait variation in plants. *Science*, 361, 475-478.

637

638 Turesson, G. (1922). The species and the variety as ecological units. *Hereditas*, 3, 100-113.

639

640 Van Tienderen, P. H. (1997). Generalists, specialists, and the evolution of phenotypic plasticity  
641 in sympatric populations of distinct species. *Evolution*, 51, 1372-1380.

642

643 Vickery, R. K. 1952. *A study of the genetic relationships in a sample of the Mimulus*  
644 *guttatus complex*. Ph.D Dissertation, Stanford University, California.

645



646 Wadgyamar, S. M., Lowry, D. B., Gould, B. A., Byron, C. N., Mactavish, R. M., & Anderson, J.  
647 T. (2017). Identifying targets and agents of selection: innovative methods to evaluate the  
648 processes that contribute to local adaptation. *Methods in Ecology and Evolution*, 8, 738-749.  
649

650 Williamson, C. E., Metzgar, S. L., Lovera, P. A., & Moeller, R. E. (1997). Solar ultraviolet  
651 radiation and the spawning habitat of yellow perch, *Perca flavescens*. *Ecological Applications*, 7,  
652 1017-1023.  
653

654 Wu, C. A., Lowry, D. B., Cooley, A. M., Wright, K. M., Lee, Y. W., & Willis, J. H. (2008).  
655 *Mimulus* is an emerging model system for the integration of ecological and genomic studies.  
656 *Heredity*, 100, 220-230.  
657

658 Younginger, B. S., Sirová, D., Cruzan, M. B., & Ballhorn, D. J. (2017). Is biomass a reliable  
659 estimate of plant fitness?. *Applications in plant sciences*, 5, 1600094.  
660

661 Yura, H. (1997). Comparative ecophysiology of *Chrysanthemum pacificum* Nakai and *Solidago*  
662 *altissima* L. 1. Why *S. altissima* cannot be established on the seashore. *Ecological Research*, 12,  
663 313-323.  
664

665 Yura, H., & Ogura, A. (2006). Sandblasting as a possible factor controlling the distribution of  
666 plants on a coastal dune system. *Plant Ecology*, 185, 199-208.  
667
